# Supplementary material
Source: HighWire-hosted journal article supplement (https://gh.bmj.com/content/6/11/e007152)
Supplement: inline-supplementary-material-1 [file inline-supplementary-material-1.pdf]

Costa et al. Growth patterns by sex and age among under-five children from 87 low- and middle-income countries.

## Supplementary material

Costa et al. Growth patterns by sex and age among under-five children from 87 low- and middle-income countries.

**eTable 1 – List of countries analyzed and corresponding survey years, data sources, and sample sizes.**

| country                   | year st | source | Ntotal |
|---------------------------|---------|--------|--------|
| Albania                   | 2017    | DHS    | 2610   |
| Algeria                   | 2012    | MICS   | 13726  |
| Angola                    | 2015    | DHS    | 7652   |
| Armenia                   | 2015    | DHS    | 1593   |
| Bangladesh                | 2019    | MICS   | 22097  |
| Belize                    | 2015    | MICS   | 2418   |
| Benin                     | 2017    | DHS    | 13243  |
| Bhutan                    | 2010    | MICS   | 5838   |
| Bosnia and Herzegovina    | 2011    | MICS   | 2153   |
| Burkina Faso              | 2010    | DHS    | 6948   |
| Burundi                   | 2016    | DHS    | 6361   |
| CAR                       | 2010    | MICS   | 10243  |
| Cambodia                  | 2014    | DHS    | 4906   |
| Cameroon                  | 2018    | DHS    | 5167   |
| Chad                      | 2014    | DHS    | 11036  |
| Comoros                   | 2012    | DHS    | 2869   |
| Congo Brazzaville         | 2014    | MICS   | 8729   |
| Congo Democratic Republic | 2017    | MICS   | 20885  |
| Costa Rica                | 2018    | MICS   | 3207   |
| Cote d'Ivoire             | 2016    | MICS   | 8949   |
| Egypt                     | 2014    | DHS    | 14678  |
| El Salvador               | 2014    | MICS   | 7225   |
| Eswatini                  | 2014    | MICS   | 2638   |
| Ethiopia                  | 2016    | DHS    | 9626   |
| Gabon                     | 2012    | DHS    | 4143   |
| Gambia                    | 2018    | MICS   | 9718   |
| Georgia                   | 2018    | MICS   | 2022   |
| Ghana                     | 2017    | MICS   | 8797   |
| Guatemala                 | 2014    | DHS    | 12280  |
| Guinea                    | 2018    | DHS    | 4061   |
| Guinea Bissau             | 2018    | MICS   | 7401   |
| Guyana                    | 2014    | MICS   | 2997   |
| Haiti                     | 2016    | DHS    | 6769   |
| Honduras                  | 2011    | DHS    | 10953  |
| India                     | 2015    | DHS    | 240098 |
| Iraq                      | 2018    | MICS   | 16355  |
| Kazakhstan                | 2015    | MICS   | 5263   |
| Kenya                     | 2014    | DHS    | 20750  |
| Kiribati                  | 2018    | MICS   | 2143   |
| Kosovo                    | 2013    | MICS   | 1510   |
| Kyrgyzstan                | 2018    | MICS   | 3436   |
| Lao                       | 2017    | MICS   | 11346  |
| Lesotho                   | 2018    | MICS   | 3141   |
| Liberia                   | 2013    | DHS    | 3863   |

| country               | year st | source | Ntotal |
|-----------------------|---------|--------|--------|
| Madagascar            | 2018    | MICS   | 12444  |
| Malawi                | 2015    | DHS    | 5726   |
| Maldives              | 2016    | DHS    | 2528   |
| Mali                  | 2018    | DHS    | 9521   |
| Mauritania            | 2015    | MICS   | 10058  |
| Mexico                | 2015    | MICS   | 7855   |
| Moldova               | 2012    | MICS   | 1669   |
| Mongolia              | 2018    | MICS   | 5932   |
| Montenegro            | 2018    | MICS   | 786    |
| Myanmar               | 2015    | DHS    | 4636   |
| Namibia               | 2013    | DHS    | 2643   |
| Nepal                 | 2016    | DHS    | 2445   |
| Niger                 | 2012    | DHS    | 5349   |
| Nigeria               | 2018    | DHS    | 12391  |
| North Macedonia       | 2018    | MICS   | 1257   |
| Pakistan              | 2017    | DHS    | 4229   |
| Papua New Guinea      | 2016    | DHS    | 4131   |
| Paraguay              | 2016    | MICS   | 4419   |
| Peru                  | 2018    | DHS    | 23313  |
| Rwanda                | 2014    | DHS    | 3816   |
| Sao Tome and Principe | 2014    | MICS   | 1944   |
| Senegal               | 2017    | DHS    | 12055  |
| Serbia                | 2019    | MICS   | 1190   |
| Sierra Leone          | 2017    | MICS   | 11399  |
| South Africa          | 2016    | DHS    | 1484   |
| South Sudan           | 2010    | MICS   | 6073   |
| State of Palestine    | 2014    | MICS   | 6939   |
| Sudan                 | 2014    | MICS   | 12422  |
| Suriname              | 2018    | MICS   | 3390   |
| Tajikistan            | 2017    | DHS    | 6037   |
| Tanzania              | 2015    | DHS    | 10194  |
| Thailand              | 2019    | MICS   | 12583  |
| Timor-Leste           | 2016    | DHS    | 6667   |
| Togo                  | 2017    | MICS   | 4908   |
| Tonga                 | 2019    | MICS   | 1295   |
| Trinidad and Tobago   | 2011    | MICS   | 1085   |
| Tunisia               | 2018    | MICS   | 3287   |
| Turkey                | 2013    | DHS    | 2792   |
| Turkmenistan          | 2019    | MICS   | 3644   |
| Uganda                | 2016    | DHS    | 5243   |
| Yemen                 | 2013    | DHS    | 14371  |
| Zambia                | 2018    | DHS    | 9617   |
| Zimbabwe              | 2019    | MICS   | 5965   |

Costa et al. Growth patterns by sex and age among under-five children from 87 low- and middle-income countries.

**eTable 2 – Predicted mean height-for-age z-scores and 95% confidence intervals by age in months and sex at the national level based on local polynomial smoothing.**

| Age in months* | Boys                        | Girls                       |
|----------------|-----------------------------|-----------------------------|
| 0.0            | -0.57 (-0.63; -0.52)        | -0.42 (-0.48; -0.36)        |
| 1.2            | -0.58 (-0.62; -0.53)        | -0.40 (-0.45; -0.35)        |
| 2.4            | -0.59 (-0.63; -0.54)        | -0.41 (-0.45; -0.37)        |
| 3.6            | -0.57 (-0.62; -0.53)        | -0.43 (-0.47; -0.39)        |
| 4.8            | -0.57 (-0.61; -0.52)        | -0.47 (-0.51; -0.43)        |
| 6.0            | -0.59 (-0.63; -0.55)        | -0.48 (-0.52; -0.44)        |
| 7.2            | -0.67 (-0.71; -0.62)        | -0.52 (-0.56; -0.48)        |
| 8.4            | -0.78 (-0.83; -0.74)        | -0.56 (-0.60; -0.52)        |
| 9.6            | -0.90 (-0.95; -0.85)        | -0.65 (-0.69; -0.61)        |
| 10.8           | -1.01 (-1.05; -0.96)        | -0.74 (-0.78; -0.70)        |
| 12.0           | -1.11 (-1.16; -1.06)        | -0.84 (-0.88; -0.80)        |
| 13.2           | -1.22 (-1.26; -1.17)        | -0.96 (-1.01; -0.92)        |
| 14.4           | -1.32 (-1.36; -1.27)        | -1.08 (-1.13; -1.04)        |
| 15.7           | -1.40 (-1.45; -1.36)        | -1.18 (-1.22; -1.13)        |
| 16.9           | -1.48 (-1.53; -1.44)        | -1.25 (-1.29; -1.20)        |
| 18.1           | -1.54 (-1.59; -1.49)        | -1.33 (-1.38; -1.29)        |
| 19.3           | -1.59 (-1.64; -1.54)        | -1.42 (-1.47; -1.37)        |
| 20.5           | -1.63 (-1.68; -1.58)        | -1.48 (-1.53; -1.43)        |
| 21.7           | -1.66 (-1.71; -1.61)        | -1.49 (-1.54; -1.44)        |
| 22.9           | -1.65 (-1.70; -1.60)        | -1.46 (-1.50; -1.41)        |
| 24.1           | -1.60 (-1.65; -1.55)        | -1.40 (-1.45; -1.35)        |
| 25.3           | -1.54 (-1.59; -1.49)        | -1.36 (-1.4; -1.31)         |
| 26.5           | -1.53 (-1.59; -1.48)        | -1.38 (-1.43; -1.33)        |
| 27.7           | -1.56 (-1.61; -1.50)        | -1.43 (-1.48; -1.38)        |
| 28.9           | -1.60 (-1.66; -1.55)        | -1.49 (-1.54; -1.44)        |
| 30.1           | -1.64 (-1.70; -1.58)        | -1.52 (-1.57; -1.47)        |
| 31.3           | -1.63 (-1.69; -1.57)        | -1.52 (-1.57; -1.48)        |
| 32.5           | -1.61 (-1.67; -1.55)        | -1.54 (-1.59; -1.49)        |
| 33.7           | -1.59 (-1.65; -1.54)        | -1.55 (-1.60; -1.50)        |
| 34.9           | -1.57 (-1.62; -1.52)        | -1.51 (-1.56; -1.46)        |
| 36.1           | -1.53 (-1.58; -1.48)        | -1.46 (-1.50; -1.41)        |
| 37.3           | -1.54 (-1.58; -1.49)        | -1.42 (-1.47; -1.38)        |
| 38.5           | -1.54 (-1.60; -1.49)        | -1.46 (-1.51; -1.41)        |
| 39.7           | -1.54 (-1.59; -1.48)        | -1.51 (-1.56; -1.46)        |
| 40.9           | -1.55 (-1.60; -1.49)        | -1.54 (-1.59; -1.49)        |
| 42.1           | -1.58 (-1.63; -1.52)        | -1.55 (-1.60; -1.51)        |
| 43.3           | -1.59 (-1.65; -1.53)        | -1.56 (-1.61; -1.51)        |
| 44.6           | -1.58 (-1.64; -1.52)        | -1.55 (-1.61; -1.50)        |
| 45.8           | -1.54 (-1.59; -1.49)        | -1.55 (-1.60; -1.50)        |
| 47.0           | -1.47 (-1.52; -1.42)        | -1.49 (-1.55; -1.44)        |
| 48.2           | <b>-1.38 (-1.44; -1.33)</b> | <b>-1.45 (-1.50; -1.40)</b> |
| 49.4           | <b>-1.35 (-1.40; -1.30)</b> | <b>-1.42 (-1.46; -1.37)</b> |
| 50.6           | <b>-1.37 (-1.42; -1.32)</b> | <b>-1.43 (-1.48; -1.38)</b> |
| 51.8           | <b>-1.40 (-1.45; -1.35)</b> | <b>-1.44 (-1.48; -1.39)</b> |

Costa et al. Growth patterns by sex and age among under-five children from 87 low- and middle-income countries.

| Age in months* | Boys                        | Girls                       |
|----------------|-----------------------------|-----------------------------|
| 53.0           | <b>-1.41 (-1.46; -1.36)</b> | <b>-1.43 (-1.47; -1.39)</b> |
| 54.2           | <b>-1.41 (-1.46; -1.36)</b> | <b>-1.44 (-1.48; -1.40)</b> |
| 55.4           | <b>-1.41 (-1.47; -1.36)</b> | <b>-1.48 (-1.52; -1.43)</b> |
| 56.6           | <b>-1.43 (-1.49; -1.38)</b> | <b>-1.49 (-1.54; -1.44)</b> |
| 57.8           | <b>-1.46 (-1.52; -1.40)</b> | <b>-1.50 (-1.55; -1.45)</b> |
| 59.0           | <b>-1.48 (-1.55; -1.41)</b> | <b>-1.49 (-1.55; -1.42)</b> |

Note: gray cells represent overlapping confidence intervals; bold text represents lower absolute HAZ among girls  
\* Age values at which the local polynomial smoothing was calculated.

Costa et al. Growth patterns by sex and age among under-five children from 87 low- and middle-income countries.

**eFigure 1 – Sex difference in mean height-for-age z-scores (boys minus girls) by country and age groups. Countries are ordered from the lowest to the highest difference value. Negative values indicate that boys fared worse than girls.**

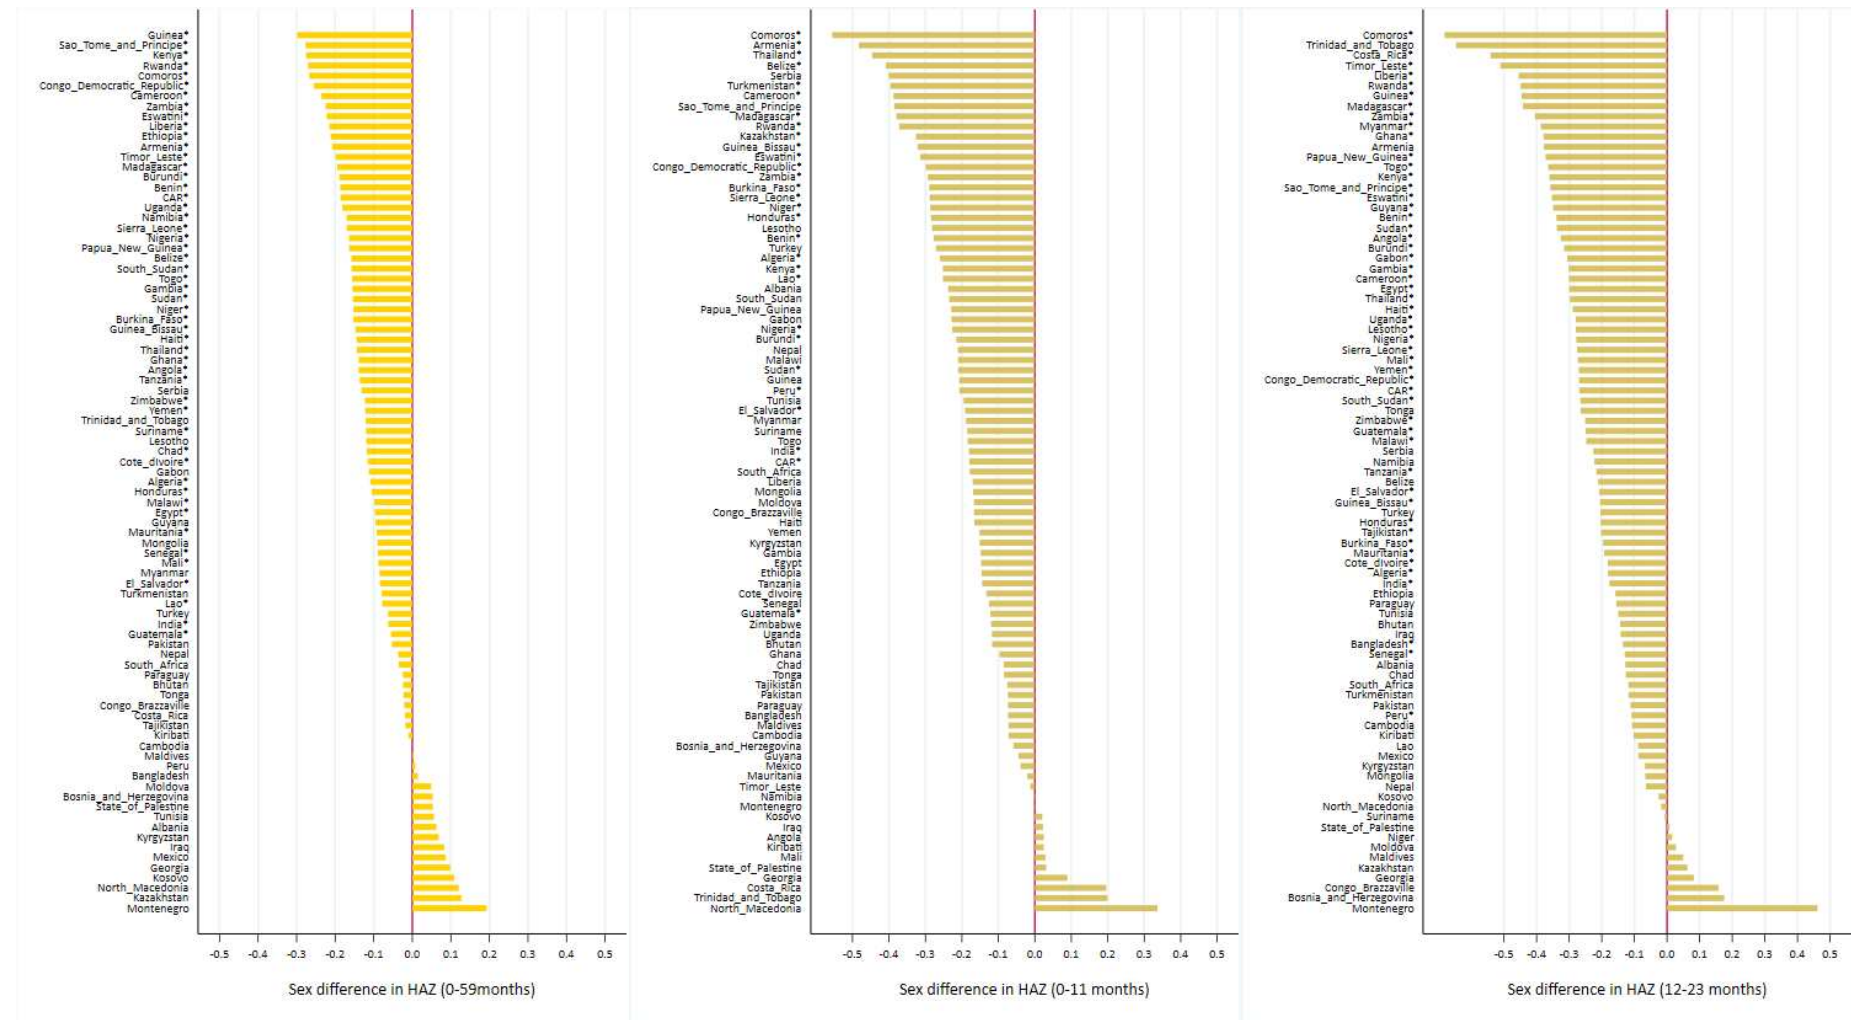

Costa et al. Growth patterns by sex and age among under-five children from 87 low- and middle-income countries.

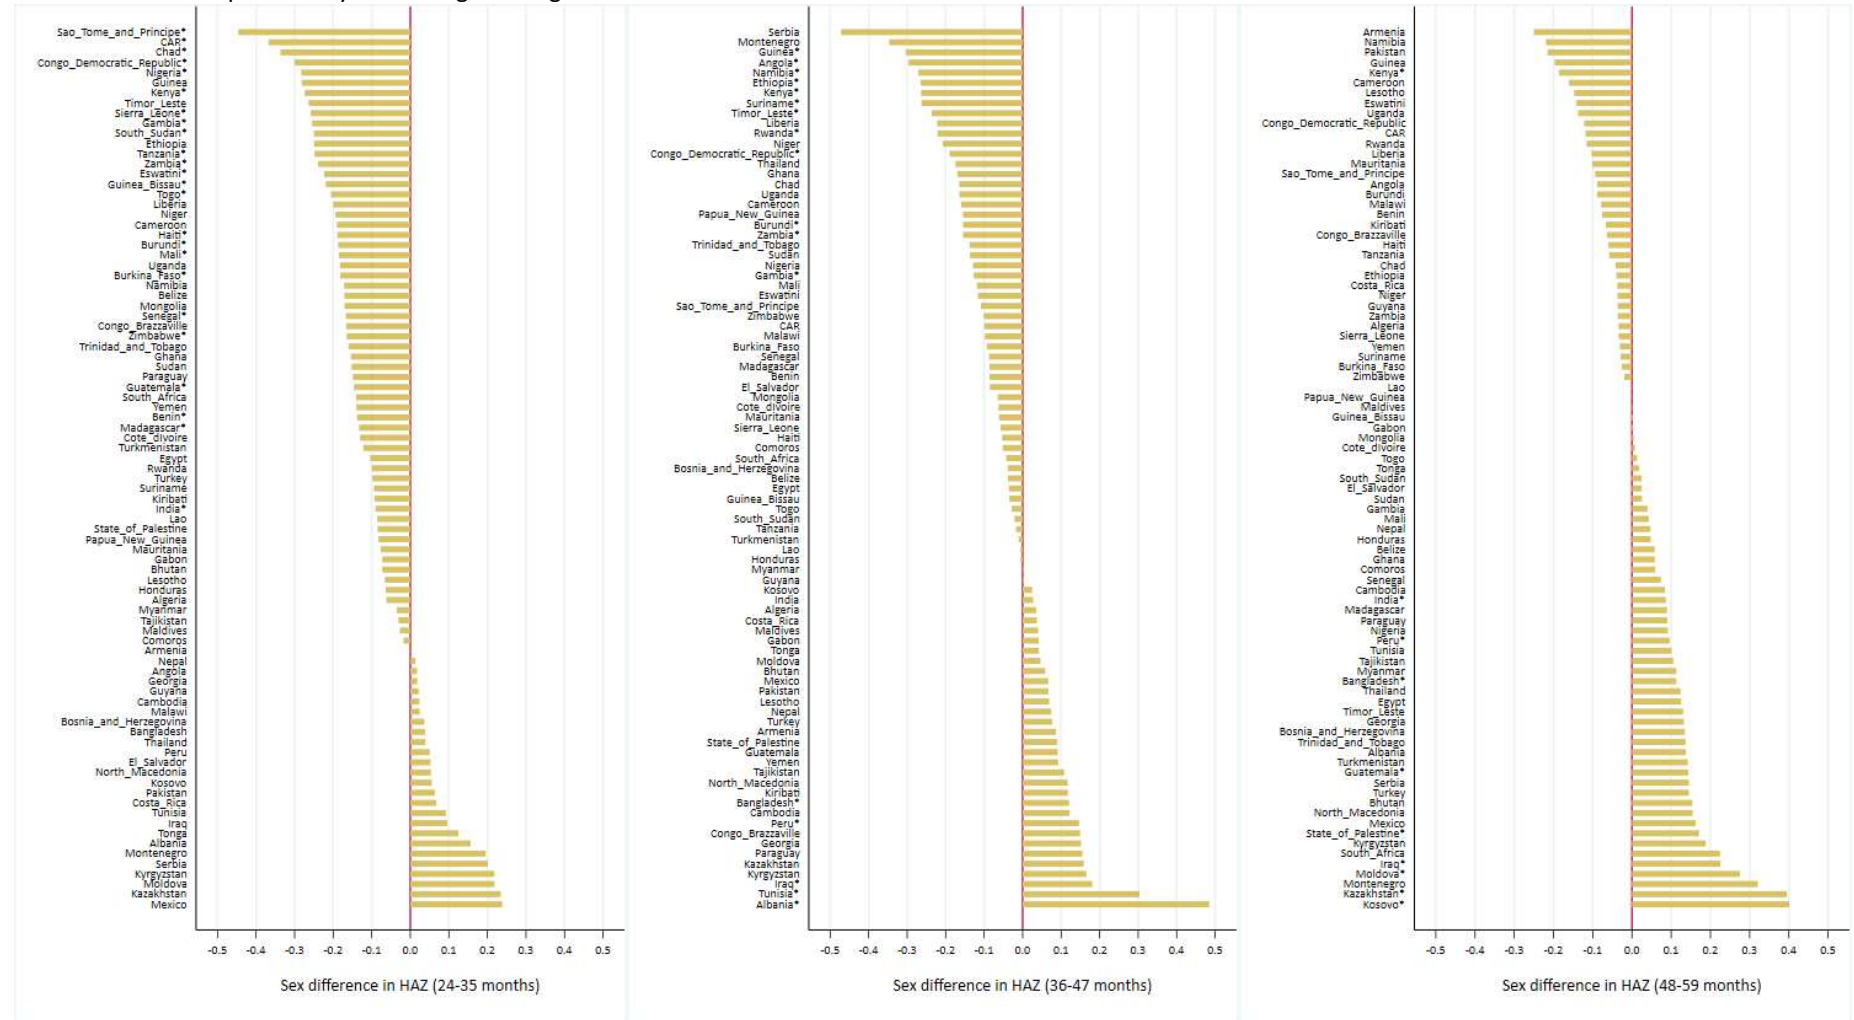

\* Statistically significant sex differences

Costa et al. Growth patterns by sex and age among under-five children from 87 low- and middle-income countries.

**eTable 3 – Linear regression coefficients for the association between sex differences in height-for-age z-scores (boys minus girls) and log-transformed GDP per capita.**

| Age group           | Intercept | Slope | p value |
|---------------------|-----------|-------|---------|
| Total (0-59 months) | -0.65     | 0.07  | <0.0001 |
| 0-11 months         | -0.52     | 0.04  | 0.03    |
| 12-23 months        | -0.72     | 0.06  | <0.0001 |
| 24-35 months        | -0.87     | 0.09  | <0.0001 |
| 36-47 months        | -0.44     | 0.05  | 0.01    |
| 48-59 months        | -0.58     | 0.07  | <0.0001 |

Costa et al. Growth patterns by sex and age among under-five children from 87 low- and middle-income countries.

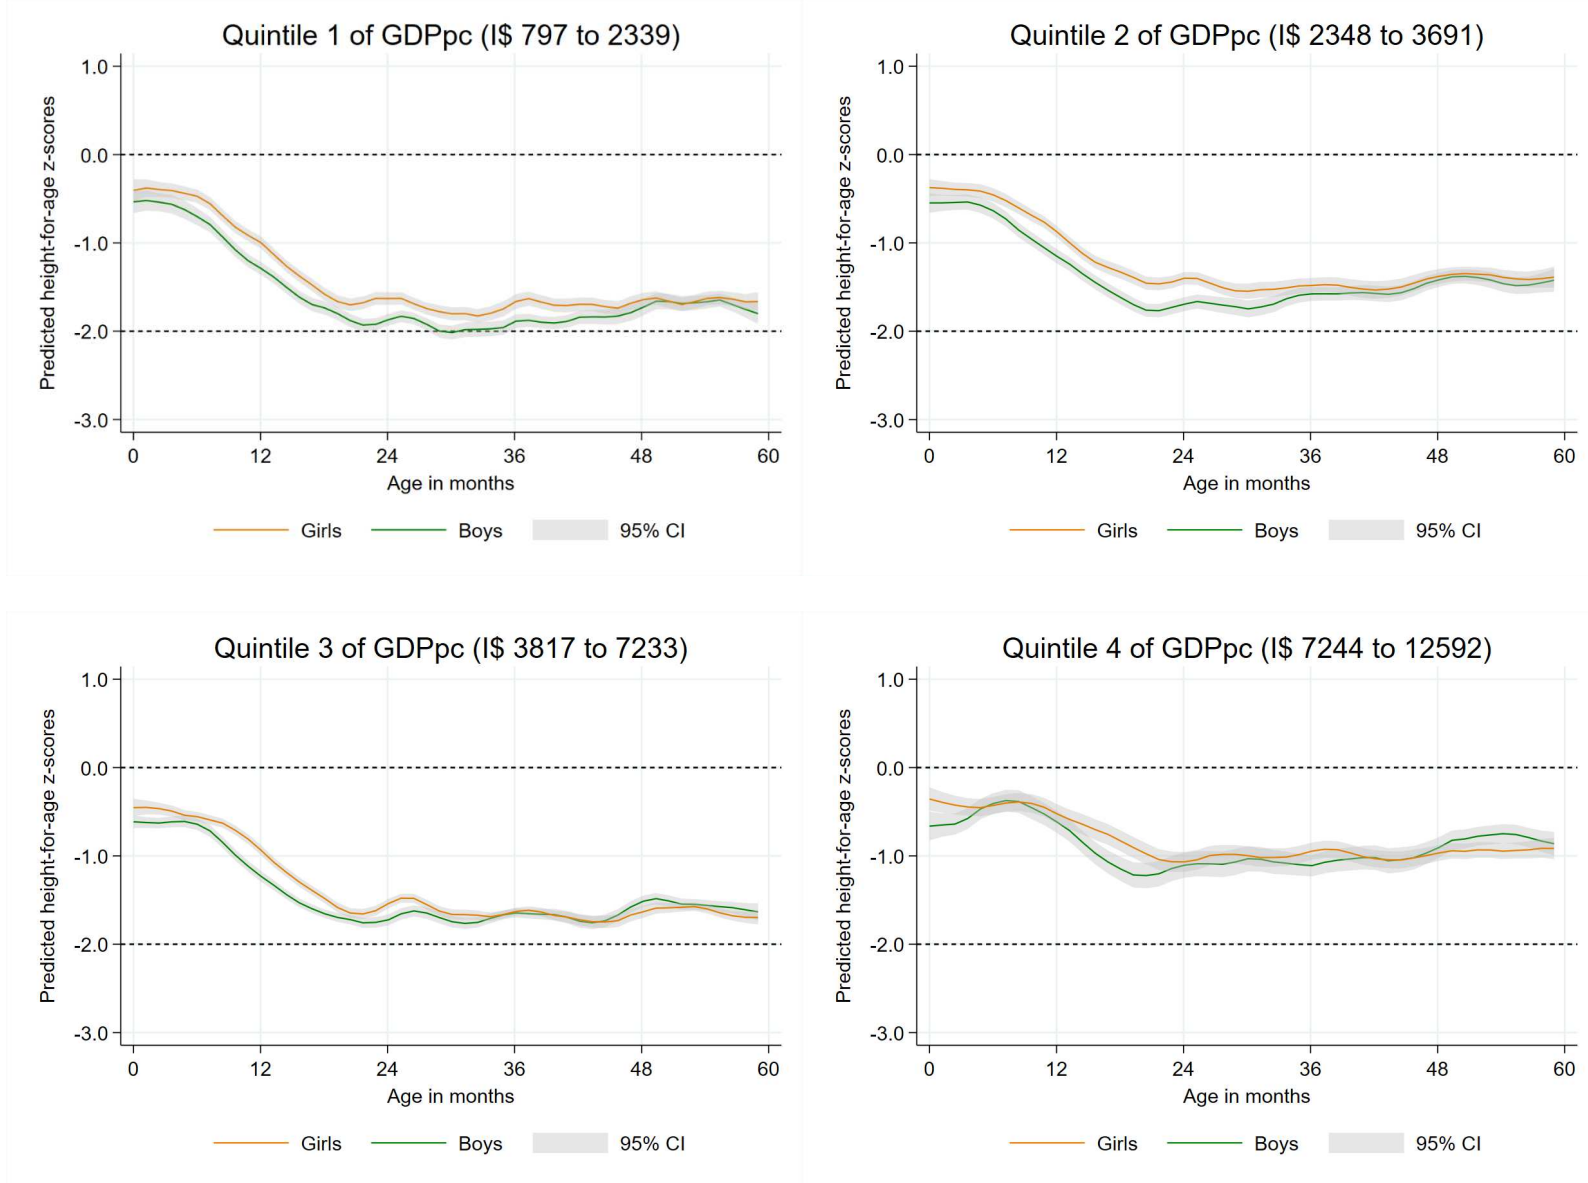



Costa et al. Growth patterns by sex and age among under-five children from 87 low- and middle-income countries.

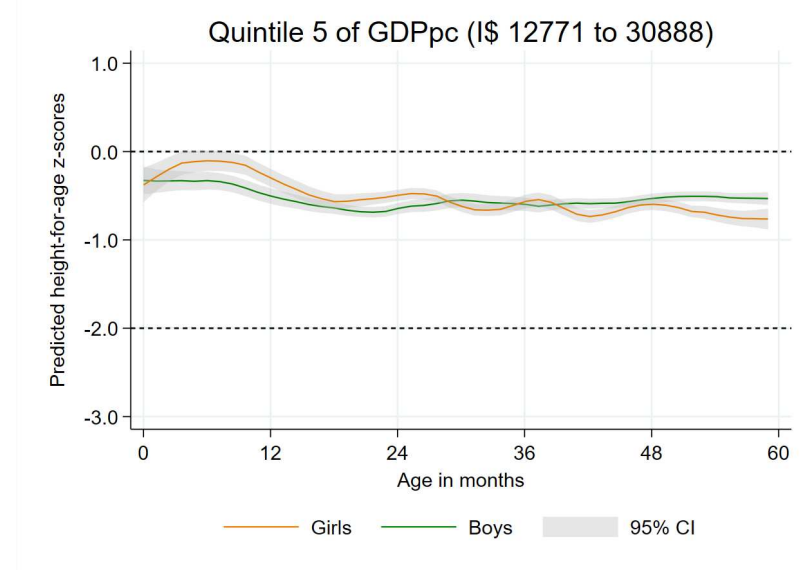

**eFigure 2 – Local polynomial predicted curves for mean height-for-age z-scores according to age in months by sex. Pooled results for under-five children from low- and middle-income countries divided into quintiles of GDP per capita (in current international dollars – I\$).**
